# Supplementary material for: Lipase immobilized in microemulsion based organogels (MBGs) as an efficient catalyst for continuous-flow esterification of protected fructose
Source: Royal Society of Chemistry journal article supplement (doi:10.1039/c5ra04686f), 2015-01-01
Supplement: c5ra04686f1.pdf [file c5ra04686f1.pdf]

# **Lipase Immobilized in Microemulsion Based Organogels (MBGs) as an Efficient Catalyst for Continuous-Flow Esterification of Protected Fructose.**

Felipe K. Sutili <sup>1,2</sup>, Daniel de O. Nogueira <sup>1</sup>, Selma G.F. Leite <sup>2</sup>, Leandro S. M.

Miranda<sup>1</sup>, Rodrigo O. M. A. de Souza<sup>1</sup>.

<sup>1</sup>Biocatalysis and Organic Synthesis Group, Chemistry Institute, Federal University of Rio de Janeiro, CEP 22941 909, Rio de Janeiro, Brazil

<sup>2</sup>Escola de Química, Federal University of Rio de Janeiro, CEP22941 909, Rio de Janeiro, Brazil

## **Supporting Information**

## FFD Experiments:

**Table S1.** Real and coded values (+ higher level, 0 intermediate, - lower level) for the independent variables in the FFD ( $2^{5-1}$ ) for esterification for both solvents used.

| Variable                                | -1 | 0    | +1  |
|-----------------------------------------|----|------|-----|
| Temperature ( $^{\circ}\text{C}$ )      | 40 | 45   | 50  |
| Amount of enzyme ( $\mu\text{g}$ )      | 30 | 105  | 180 |
| Substrate concentration in heptane (mM) | 5  | 25.5 | 50  |
| Substrate concentration in toluene (mM) | 5  | 52,5 | 100 |
| Molecular sieves (%)*                   | 10 | 15   | 20  |
| Stirring (rpm)                          | 50 | 150  | 250 |

\*w/v

Once the relevant variables were selected by factorial design, a central composite rotatable design (CCRD) was employed to obtain the optimum conditions for esterification synthesis for each solvent used. This design was considered the axial points for obtaining a quadratic model. The variables, along with their coded and values, are given in Table S2 and S3, for heptane and toluene, respectively. In the CCRD, each of the three selected variables was varied at five levels.

**Table S2.** Real and coded values (+ higher level, 0 intermediate, - lower level) for the independent variables in the CCRD ( $2^3$ ) for esterification performed in heptane.

| Variables                          | -1,68 | -1    | 0    | +1    | +1,68 |
|------------------------------------|-------|-------|------|-------|-------|
| Amount of enzyme ( $\mu\text{g}$ ) | 30    | 54.3  | 90   | 125.7 | 150   |
| Substrate concentration (mM)       | 5     | 10.1  | 17.5 | 24.9  | 30    |
| Stirring (rpm)                     | 150   | 180.4 | 225  | 269.6 | 300   |

Conditions maintained constant: temperature ( $50^{\circ}\text{C}$ ) and amount of molecular sieves (15%).

**Table S3.** Real and coded values (+ higher level, 0 intermediate, - lower level) for the independent variables in the CCRD (2<sup>3</sup>) for esterification performed in toluene.

| Variables                    | -1,68 | -1    | 0    | +1    | +1,68 |
|------------------------------|-------|-------|------|-------|-------|
| Temperature (°C)             | 45    | 47    | 50   | 53    | 55    |
| Substrate concentration (mM) | 5     | 10.1  | 17.5 | 24.9  | 30    |
| Molecular sieves (%)*        | 10    | 12.02 | 15   | 17.98 | 20    |

\*w/v

Conditions maintained constant: amount of enzyme (105 µg) and stirring (150rpm).

The experimental designs and results analysis were carried out using the software Statistica 6.0 (Statsoft, Inc., USA) according to the significance level established to obtain the mathematical model. The significance of the regression coefficients and the associated probabilities, p(t), were determined by Student's t test; the model equation significance was determined by Fisher's F test. The variance explained by the model is given by the multiple determination coefficients, R<sup>2</sup>

Experimental data and the matrix for the FFD for the selection of most important variables conditions for esterification reaction in a batch conditions are represented in Table S4. FFD consisted of sixteen factorial points and three replications at the central point for to calculate the experimental error.

**Table S4.** Matrix of fractional factorial experimental design (2<sup>5-1</sup>) with coded values and conversion reactions performed in toluene and heptanes.

| Entries | T<br>(°C) | E<br>(µg) | S<br>(mM) | M. S.<br>(%) <sup>a</sup> | St<br>(rpm) | Heptane<br>(%) <sup>b</sup> | Toluene<br>(%) <sup>b</sup> |
|---------|-----------|-----------|-----------|---------------------------|-------------|-----------------------------|-----------------------------|
| 1       | -1        | -1        | -1        | -1                        | +1          | 62                          | 64,1                        |
| 2       | +1        | -1        | -1        | -1                        | -1          | 64,4                        | 54,7                        |
| 3       | -1        | +1        | -1        | -1                        | -1          | 56,1                        | 52,8                        |
| 4       | +1        | +1        | -1        | -1                        | +1          | 59,4                        | 59,9                        |
| 5       | -1        | -1        | +1        | -1                        | -1          | 49,7                        | 2,2                         |
| 6       | +1        | -1        | +1        | -1                        | +1          | 58,4                        | 30,9                        |
| 7       | -1        | +1        | +1        | -1                        | +1          | 66                          | 27,1                        |
| 8       | +1        | +1        | +1        | -1                        | -1          | 25,8                        | 42,2                        |
| 9       | -1        | -1        | -1        | +1                        | -1          | 56,1                        | 56,6                        |
| 10      | +1        | -1        | -1        | +1                        | +1          | 64,8                        | 64,1                        |
| 11      | -1        | +1        | -1        | +1                        | +1          | 56,7                        | 49,0                        |
| 12      | +1        | +1        | -1        | +1                        | -1          | 62,1                        | 50,9                        |

|    |    |    |    |    |    |      |      |
|----|----|----|----|----|----|------|------|
| 13 | -1 | -1 | +1 | +1 | +1 | 59,3 | 14,8 |
| 14 | +1 | -1 | +1 | +1 | -1 | 62,6 | 42,9 |
| 15 | -1 | +1 | +1 | +1 | -1 | 41   | 18,9 |
| 16 | +1 | +1 | +1 | +1 | +1 | 55,9 | 17,9 |
| 17 | 0  | 0  | 0  | 0  | 0  | 46,2 | 35,9 |
| 18 | 0  | 0  | 0  | 0  | 0  | 46,2 | 34,9 |
| 19 | 0  | 0  | 0  | 0  | 0  | 44   | 33,8 |

<sup>a</sup>w/v

<sup>b</sup> Measured by Lowry–Tinsley method.

**Pareto chart from CCRD performed in toluene and hexane:**

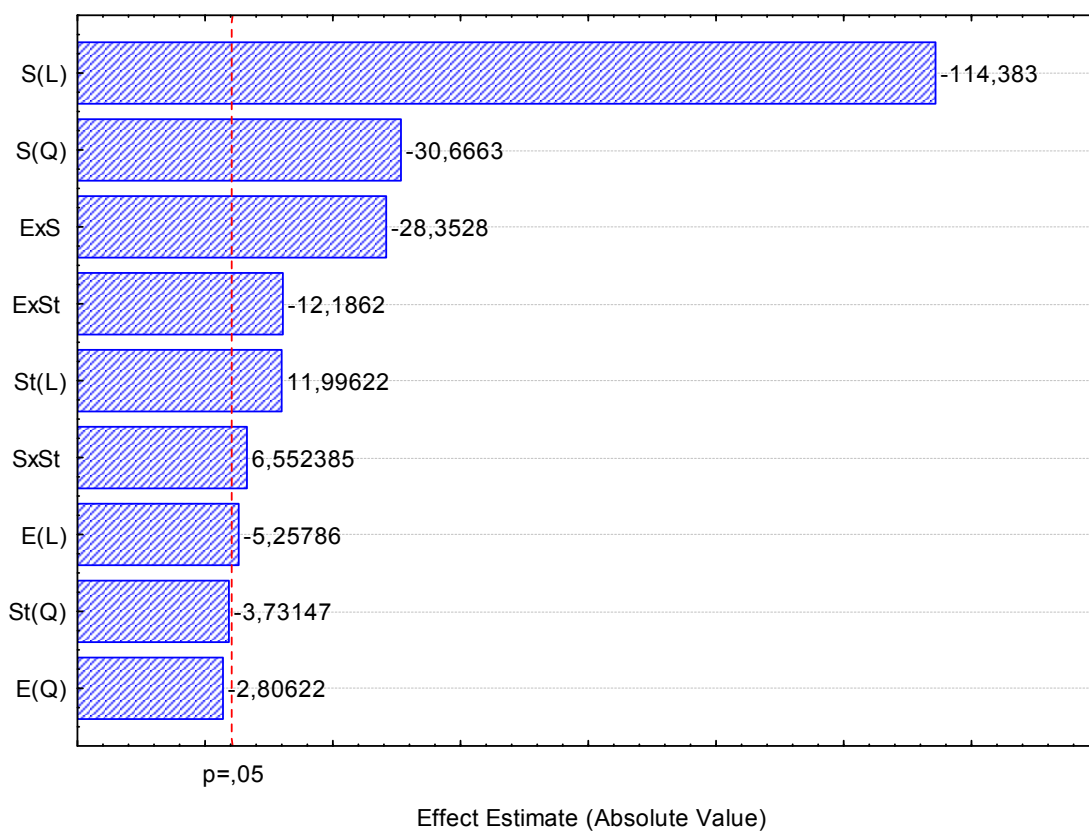

**Figure S1.** Pareto chart from CCRD performed in heptane showing the significance of experimental variables: T, temperature; S, substrate concentration; E, amount of enzyme; St, stirring; L, linear effect; and Q, quadratic effect

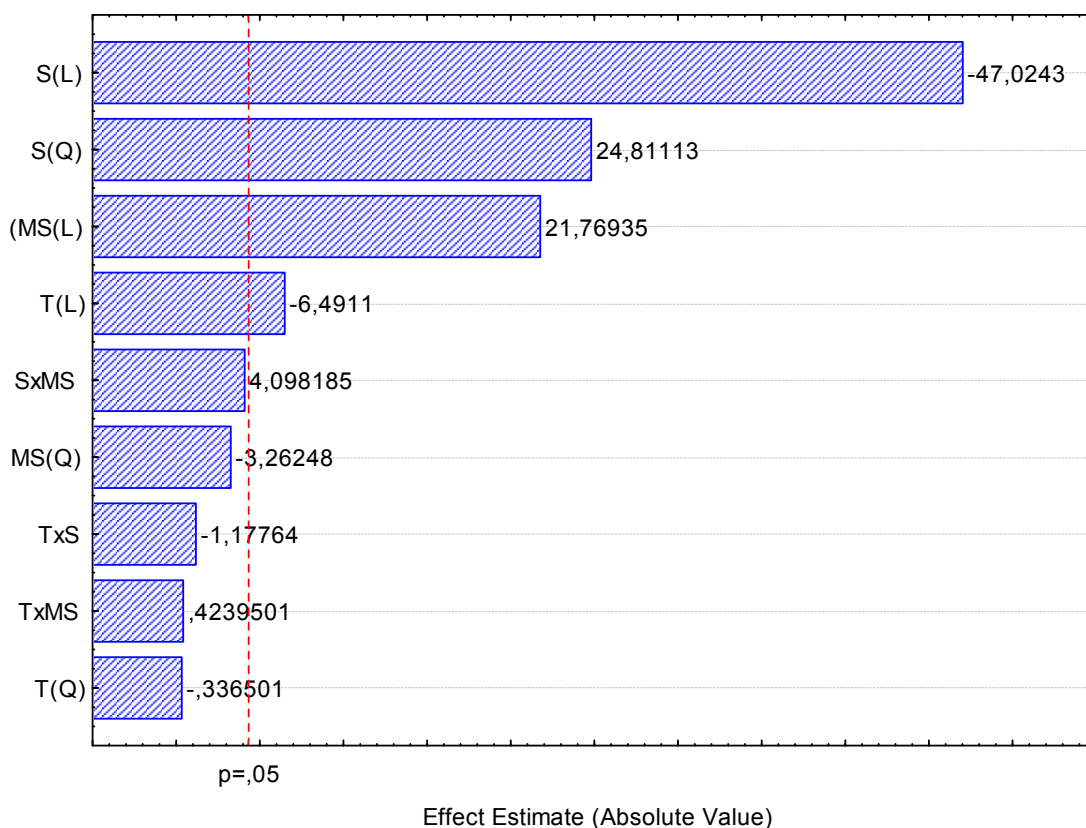

**Figure S2.** Pareto chart from CCRD performed in toluene showing the significance of experimental variables: T, temperature; S, substrate concentration; MS, amount of molecular sieve; L, linear effect; and Q, quadratic effect

**Statistical testing of the model was done by the Fisher's statistical test for ANOVA.**

**Table S7.** Variance analysis for validation of mathematical models (ANOVA)\*

| Factor      | Sum of Squares |         | Degrees of freedom |    | Mean Square |        | F calculated |       | F tabulated |      |
|-------------|----------------|---------|--------------------|----|-------------|--------|--------------|-------|-------------|------|
|             | H              | T       | H                  | T  | H           | T      | H            | T     | H           | T    |
| Regression  | 5083,16        | 1964,10 | 7                  | 4  | 726,16      | 491,02 | 11,90        | 23,87 | 3,29        | 3,25 |
| Residuals   | 549,12         | 246,82  | 9                  | 12 | 61,01       | 20,56  |              |       |             |      |
| Lack of fit | 548,45         | 245,60  | 7                  | 10 |             |        |              |       |             |      |
| Pure error  | 0,66           | 1,21    | 2                  | 2  |             |        |              |       |             |      |
| TOTAL       | 5632,28        | 2210,91 | 16                 | 16 |             |        |              |       |             |      |

Confidence level 95%.

H for reactions performed in heptane and in toluene.
